# Supplementary material for: Study of the most relevant spin–orbit coupling descriptions of magnetic excitations in a series of lanthanide complexes
Source: Royal Society of Chemistry journal article supplement (doi:10.1039/d1cp05469d), 2022-01-01
Supplement: d1cp05469d1.pdf [file d1cp05469d1.pdf]

**Supporting Information:**

**Study of the Most Relevant Spin-Orbit Coupling  
Descriptions of Magnetic Excitations in a Series of  
Lanthanide Complexes**

Shashank Vittal Rao, Matteo Piccardo, and Alessandro Soncini\*

E-mail: [asoncini@unimelb.edu.au](mailto:asoncini@unimelb.edu.au)

## List of Tables

|     |                                                                                        |      |
|-----|----------------------------------------------------------------------------------------|------|
| S1  | Statistical analysis for Ln-acac <sub>3</sub> -(H <sub>2</sub> O) <sub>2</sub> systems | S-3  |
| S2  | Statistical analysis for Dy(III) systems                                               | S-5  |
| S3  | Eu <sup>3+</sup> energy levels                                                         | S-7  |
| S4  | Pr-acac <sub>3</sub> -(H <sub>2</sub> O) <sub>2</sub> energy levels                    | S-8  |
| S5  | Nd-acac <sub>3</sub> -(H <sub>2</sub> O) <sub>2</sub> energy levels                    | S-9  |
| S6  | Sm-acac <sub>3</sub> -(H <sub>2</sub> O) <sub>2</sub> energy levels                    | S-10 |
| S7  | Eu-acac <sub>3</sub> -(H <sub>2</sub> O) <sub>2</sub> energy levels                    | S-11 |
| S8  | Gd-acac <sub>3</sub> -(H <sub>2</sub> O) <sub>2</sub> energy levels                    | S-13 |
| S9  | Tb-acac <sub>3</sub> -(H <sub>2</sub> O) <sub>2</sub> energy levels                    | S-14 |
| S10 | Dy-acac <sub>3</sub> -(H <sub>2</sub> O) <sub>2</sub> energy levels                    | S-15 |
| S11 | Dy-acac <sub>3</sub> -dppz energy levels                                               | S-16 |
| S12 | Dy-acac <sub>3</sub> -dpq energy levels                                                | S-17 |
| S13 | Dy-acac <sub>3</sub> -phen energy levels                                               | S-18 |
| S14 | Dy-hfac <sub>3</sub> -glyme energy levels                                              | S-19 |
| S15 | Dy-trensac energy levels                                                               | S-20 |
| S16 | Dy-paah <sub>2</sub> -(NO <sub>3</sub> ) <sub>2</sub> -MeOH energy levels              | S-21 |
| S17 | Dy-tta <sub>3</sub> -phen energy levels                                                | S-22 |
| S18 | Dy-tta <sub>3</sub> -bipy energy levels                                                | S-23 |
| S19 | Ho-acac <sub>3</sub> -(H <sub>2</sub> O) <sub>2</sub> energy levels                    | S-24 |
| S20 | Er-acac <sub>3</sub> -(H <sub>2</sub> O) <sub>2</sub> energy levels                    | S-25 |
| S21 | Tm-acac <sub>3</sub> -(H <sub>2</sub> O) <sub>2</sub> energy levels                    | S-26 |
| S22 | Yb-acac <sub>3</sub> -(H <sub>2</sub> O) <sub>2</sub> energy levels                    | S-27 |

Table S1: Mean  $\mu$  and standard deviation  $\sigma$  for the %errors affecting the energy gaps within the lowest energy spin-orbit multiplets for Ln-acac<sub>3</sub>-(H<sub>2</sub>O)<sub>2</sub> complexes, estimated using different approximations to spin-orbit coupling Hamiltonian with respect to the results obtained by inclusion of the true Breit-Pauli Hamiltonian contribution. Between parenthesis the mean absolute errors (MAE) when different from  $|\mu|$ . Computations at CAHF/CASCI-SO level on ANO-RCC basis set, with the contraction [8s7p5d3f2g1h] for Ln atoms, [4s3p2d1f] for O, [3s2p] for C, [2s] for H.

|         |                                |          | $\mathcal{H}_{\text{SO}}^{(1)}$ | $\mathcal{H}_{\text{SO}}^{\text{MF}}$ | $\mathcal{H}_{\text{SO}}^{\text{AMF}}$ | $\mathcal{H}_{\text{SO}}^{\text{ABP}}$ |
|---------|--------------------------------|----------|---------------------------------|---------------------------------------|----------------------------------------|----------------------------------------|
| Pr(III) | <sup>3</sup> H <sub>4</sub>    | $\mu$    | -5.396                          | 0.110                                 | 0.192                                  | 0.082                                  |
|         |                                | $\sigma$ | 3.888                           | 0.179                                 | 0.055                                  | 0.132                                  |
|         |                                |          | —                               | —                                     | —                                      | (0.141)                                |
|         | <sup>3</sup> H <sub>5</sub>    | $\mu$    | 110.704                         | 0.286                                 | 0.292                                  | 0.006                                  |
|         |                                | $\sigma$ | 8.275                           | 0.021                                 | 0.027                                  | 0.007                                  |
|         |                                |          | —                               | —                                     | —                                      | (0.008)                                |
| Nd(III) | <sup>4</sup> I <sub>9/2</sub>  | $\mu$    | -6.263                          | 0.009                                 | 0.307                                  | 0.310                                  |
|         |                                | $\sigma$ | 1.757                           | 0.012                                 | 0.103                                  | 0.100                                  |
|         |                                |          | —                               | (0.012)                               | —                                      | —                                      |
|         | <sup>4</sup> I <sub>11/2</sub> | $\mu$    | 122.487                         | 1.355                                 | 1.367                                  | 0.013                                  |
|         |                                | $\sigma$ | 4.852                           | 0.054                                 | 0.057                                  | 0.003                                  |
|         |                                |          | —                               | —                                     | —                                      | —                                      |
| Sm(III) | <sup>6</sup> H <sub>5/2</sub>  | $\mu$    | -1.143                          | -0.173                                | -0.394                                 | -0.225                                 |
|         |                                | $\sigma$ | 1.629                           | 0.171                                 | 0.202                                  | 0.032                                  |
|         |                                |          | (1.152)                         | —                                     | —                                      | —                                      |
|         | <sup>6</sup> H <sub>7/2</sub>  | $\mu$    | 139.270                         | 3.311                                 | 3.269                                  | -0.043                                 |
|         |                                | $\sigma$ | 14.078                          | 0.352                                 | 0.347                                  | 0.006                                  |
|         |                                |          | —                               | —                                     | —                                      | —                                      |
| Eu(III) | <sup>7</sup> F <sub>1</sub>    | $\mu$    | 332.099                         | 3.597                                 | 3.596                                  | -0.002                                 |
|         |                                | $\sigma$ | 138.924                         | 1.496                                 | 1.562                                  | 0.067                                  |
|         |                                |          | —                               | —                                     | —                                      | (0.048)                                |
|         | <sup>7</sup> F <sub>2</sub>    | $\mu$    | 241.787                         | 3.614                                 | 3.603                                  | -0.012                                 |
|         |                                | $\sigma$ | 23.919                          | 0.357                                 | 0.379                                  | 0.022                                  |
|         |                                |          | —                               | —                                     | —                                      | (0.020)                                |
|         | <sup>7</sup> F <sub>3</sub>    | $\mu$    | 199.905                         | 3.969                                 | 3.959                                  | -0.011                                 |
|         |                                | $\sigma$ | 4.856                           | 0.110                                 | 0.121                                  | 0.016                                  |
|         |                                |          | —                               | —                                     | —                                      | (0.017)                                |
|         | <sup>7</sup> F <sub>4</sub>    | $\mu$    | 171.805                         | 4.402                                 | 4.393                                  | -0.009                                 |
|         |                                | $\sigma$ | 5.272                           | 0.141                                 | 0.138                                  | 0.006                                  |
|         |                                |          | —                               | —                                     | —                                      | (0.010)                                |
|         | <sup>7</sup> F <sub>5</sub>    | $\mu$    | 150.097                         | 4.874                                 | 4.867                                  | -0.008                                 |
|         |                                | $\sigma$ | 4.334                           | 0.153                                 | 0.143                                  | 0.011                                  |
|         |                                |          | —                               | —                                     | —                                      | (0.009)                                |
|         | <sup>7</sup> F <sub>6</sub>    | $\mu$    | 131.530                         | 5.381                                 | 5.375                                  | -0.007                                 |
|         |                                | $\sigma$ | 4.176                           | 0.157                                 | 0.146                                  | 0.014                                  |
|         |                                |          | —                               | —                                     | —                                      | (0.013)                                |

|         |                     |          |          |        |         |         |
|---------|---------------------|----------|----------|--------|---------|---------|
| Gd(III) | $^8\text{H}_{7/2}$  | $\mu$    | 348.856  | 0.023  | -11.697 | -11.716 |
|         |                     | $\sigma$ | 17.186   | 0.020  | 5.138   | 5.119   |
|         |                     |          | -        | -      | -       | -       |
|         | $^6\text{P}_{7/2}$  | $\mu$    | -7.932   | 0.033  | 0.033   | 0.000   |
|         |                     | $\sigma$ | 0.101    | 0.000  | 0.000   | 0.000   |
|         |                     |          | -        | -      | -       | -       |
| Tb(III) | $^7\text{F}_6$      | $\mu$    | -0.063   | -0.305 | -0.076  | 0.227   |
|         |                     | $\sigma$ | 2.040    | 0.200  | 0.449   | 0.299   |
|         |                     |          | (1.693)  | -      | (0.205) | (0.339) |
|         | $^7\text{F}_5$      | $\mu$    | 97.419   | -3.595 | -3.573  | 0.024   |
|         |                     | $\sigma$ | 5.425    | 0.193  | 0.201   | 0.009   |
|         |                     |          | -        | -      | -       | -       |
| Dy(III) | $^6\text{H}_{15/2}$ | $\mu$    | -3.570   | -0.095 | 0.111   | 0.211   |
|         |                     | $\sigma$ | 0.881    | 0.043  | 0.081   | 0.069   |
|         |                     |          | -        | -      | -       | -       |
|         | $^6\text{H}_{13/2}$ | $\mu$    | 99.011   | -2.967 | -2.958  | 0.011   |
|         |                     | $\sigma$ | 3.176    | 0.093  | 0.102   | 0.010   |
|         |                     |          | -        | -      | -       | (0.012) |
| Ho(III) | $^5\text{I}_8$      | $\mu$    | -10.770  | -0.196 | 0.343   | 0.562   |
|         |                     | $\sigma$ | 0.668    | 0.055  | 0.749   | 0.726   |
|         |                     |          | -        | -      | (0.627) | (0.807) |
|         | $^5\text{I}_7$      | $\mu$    | 97.141   | -2.207 | -2.195  | 0.013   |
|         |                     | $\sigma$ | 1.063    | 0.022  | 0.033   | 0.012   |
|         |                     |          | -        | -      | -       | (0.014) |
| Er(III) | $^4\text{I}_{15/2}$ | $\mu$    | 1.180    | -0.047 | -0.971  | -0.923  |
|         |                     | $\sigma$ | 1.655    | 0.038  | 1.034   | 1.038   |
|         |                     |          | (1.695)  | -      | -       | -       |
|         | $^4\text{I}_{13/2}$ | $\mu$    | 89.393   | -1.194 | -1.213  | -0.018  |
|         |                     | $\sigma$ | 0.996    | 0.014  | 0.010   | 0.007   |
|         |                     |          | -        | -      | -       | -       |
| Tm(III) | $^3\text{H}_6$      | $\mu$    | -0.021   | -0.020 | -0.484  | -0.460  |
|         |                     | $\sigma$ | 0.665    | 0.015  | 0.512   | 0.516   |
|         |                     |          | (0.529)  | -      | (0.667) | (0.649) |
|         | $^3\text{H}_5$      | $\mu$    | 9.628    | -0.734 | -0.757  | -0.022  |
|         |                     | $\sigma$ | 37.226   | 0.179  | 0.180   | 0.002   |
|         |                     |          | (21.252) | -      | -       | -       |
| Yb(III) | $^2\text{F}_{7/2}$  | $\mu$    | 0.703    | 0.004  | -0.267  | -0.267  |
|         |                     | $\sigma$ | 0.258    | 0.001  | 0.108   | 0.108   |
|         |                     |          | -        | -      | -       | -       |
|         | $^2\text{F}_{5/2}$  | $\mu$    | 79.167   | 0.258  | 0.247   | -0.011  |
|         |                     | $\sigma$ | 1.090    | 0.004  | 0.001   | 0.004   |
|         |                     |          | -        | -      | -       | -       |

Table S2: Mean  $\mu$  and standard deviation  $\sigma$  for the %errors affecting the energy gaps within the ground  ${}^6\text{H}_{15/2}$  and first excited  ${}^6\text{H}_{13/2}$  spin-orbit multiplet for different Dy(III) complexes, estimated using different approximations to spin-orbit coupling Hamiltonian with respect to the results obtained by inclusion of the true Breit-Pauli Hamiltonian contribution. Between parenthesis the mean absolute errors (MAE) when different from  $|\mu|$ . Computations at CAHF/CASCI-SO level on ANO-RCC basis set, with the contraction [8s7p5d3f2g1h] for Ln atoms, [4s3p2d1f] for N and O when coordinating the metal, [3s2p] for N and O not coordinating the metal, C, F, S, and [2s] for H.

|                                                    |                       |          | $\mathcal{H}_{\text{SO}}^{(1)}$ | $\mathcal{H}_{\text{SO}}^{\text{MF}}$ | $\mathcal{H}_{\text{SO}}^{\text{AMF}}$ | $\mathcal{H}_{\text{SO}}^{\text{ABP}}$ |
|----------------------------------------------------|-----------------------|----------|---------------------------------|---------------------------------------|----------------------------------------|----------------------------------------|
| acac <sub>3</sub> -(H <sub>2</sub> O) <sub>2</sub> | ${}^6\text{H}_{15/2}$ | $\mu$    | -3.570                          | -0.095                                | 0.111                                  | 0.211                                  |
|                                                    |                       | $\sigma$ | 0.881                           | 0.043                                 | 0.081                                  | 0.069                                  |
|                                                    |                       |          | –                               | –                                     | –                                      | –                                      |
|                                                    | ${}^6\text{H}_{13/2}$ | $\mu$    | 99.011                          | -2.967                                | -2.958                                 | 0.011                                  |
|                                                    |                       | $\sigma$ | 3.176                           | 0.093                                 | 0.102                                  | 0.010                                  |
|                                                    |                       |          | –                               | –                                     | –                                      | (0.012)                                |
| acac <sub>3</sub> -dppz                            | ${}^6\text{H}_{15/2}$ | $\mu$    | -3.800                          | -0.096                                | -0.015                                 | 0.088                                  |
|                                                    |                       | $\sigma$ | 1.095                           | 0.044                                 | 0.074                                  | 0.075                                  |
|                                                    |                       |          | –                               | –                                     | (0.051)                                | (0.108)                                |
|                                                    | ${}^6\text{H}_{13/2}$ | $\mu$    | 99.662                          | -2.984                                | -2.985                                 | 0.000                                  |
|                                                    |                       | $\sigma$ | 2.733                           | 0.080                                 | 0.084                                  | 0.006                                  |
|                                                    |                       |          | –                               | –                                     | –                                      | (0.004)                                |
| acac <sub>3</sub> -dpq                             | ${}^6\text{H}_{15/2}$ | $\mu$    | -3.777                          | -0.096                                | -0.091                                 | 0.011                                  |
|                                                    |                       | $\sigma$ | 0.964                           | 0.036                                 | 0.069                                  | 0.053                                  |
|                                                    |                       |          | –                               | –                                     | (0.103)                                | (0.039)                                |
|                                                    | ${}^6\text{H}_{13/2}$ | $\mu$    | 100.161                         | -2.999                                | -3.004                                 | -0.004                                 |
|                                                    |                       | $\sigma$ | 3.052                           | 0.089                                 | 0.091                                  | 0.004                                  |
|                                                    |                       |          | –                               | –                                     | –                                      | (0.005)                                |
| acac <sub>3</sub> -phen                            | ${}^6\text{H}_{15/2}$ | $\mu$    | -3.899                          | -0.097                                | -0.014                                 | 0.091                                  |
|                                                    |                       | $\sigma$ | 1.141                           | 0.041                                 | 0.107                                  | 0.109                                  |
|                                                    |                       |          | –                               | –                                     | (0.081)                                | (0.120)                                |
|                                                    | ${}^6\text{H}_{13/2}$ | $\mu$    | 99.780                          | -2.988                                | -2.988                                 | 0.001                                  |
|                                                    |                       | $\sigma$ | 3.025                           | 0.088                                 | 0.096                                  | 0.010                                  |
|                                                    |                       |          | –                               | –                                     | –                                      | (0.007)                                |
| hfac <sub>3</sub> -glyme                           | ${}^6\text{H}_{15/2}$ | $\mu$    | -3.330                          | -0.086                                | 0.097                                  | 0.189                                  |
|                                                    |                       | $\sigma$ | 1.267                           | 0.030                                 | 0.149                                  | 0.144                                  |
|                                                    |                       |          | –                               | –                                     | (0.138)                                | (0.206)                                |
|                                                    | ${}^6\text{H}_{13/2}$ | $\mu$    | 101.368                         | -3.032                                | -3.027                                 | 0.006                                  |
|                                                    |                       | $\sigma$ | 2.422                           | 0.071                                 | 0.086                                  | 0.017                                  |
|                                                    |                       |          | –                               | –                                     | –                                      | (0.013)                                |
| trensal                                            | ${}^6\text{H}_{15/2}$ | $\mu$    | 1.396                           | -0.127                                | -0.026                                 | 0.107                                  |
|                                                    |                       | $\sigma$ | 5.883                           | 0.061                                 | 0.074                                  | 0.043                                  |
|                                                    |                       |          | (4.962)                         | –                                     | (0.046)                                | –                                      |
|                                                    | ${}^6\text{H}_{13/2}$ | $\mu$    | 99.872                          | -2.989                                | -2.988                                 | 0.001                                  |
|                                                    |                       | $\sigma$ | 4.005                           | 0.114                                 | 0.120                                  | 0.007                                  |
|                                                    |                       |          | –                               | –                                     | –                                      | (0.006)                                |

|                                           |                                |          |         |        |         |         |
|-------------------------------------------|--------------------------------|----------|---------|--------|---------|---------|
| paah <sub>2</sub> -2no <sub>3</sub> -meoh | <sup>6</sup> H <sub>15/2</sub> | $\mu$    | -3.227  | -0.088 | 0.096   | 0.197   |
|                                           |                                | $\sigma$ | 2.059   | 0.017  | 0.078   | 0.066   |
|                                           |                                |          | —       | —      | —       | —       |
|                                           | <sup>6</sup> H <sub>13/2</sub> | $\mu$    | 100.177 | -2.999 | -2.993  | 0.007   |
|                                           |                                | $\sigma$ | 2.953   | 0.085  | 0.092   | 0.008   |
|                                           |                                |          | —       | —      | —       | (0.008) |
| tta <sub>3</sub> -phen                    | <sup>6</sup> H <sub>15/2</sub> | $\mu$    | -3.336  | -0.098 | 0.119   | 0.229   |
|                                           |                                | $\sigma$ | 1.314   | 0.035  | 0.058   | 0.044   |
|                                           |                                |          | —       | —      | —       | —       |
|                                           | <sup>6</sup> H <sub>13/2</sub> | $\mu$    | 100.652 | -3.012 | -3.005  | 0.008   |
|                                           |                                | $\sigma$ | 2.833   | 0.082  | 0.093   | 0.011   |
|                                           |                                |          | —       | —      | —       | (0.010) |
| tta <sub>3</sub> -bipy                    | <sup>6</sup> H <sub>15/2</sub> | $\mu$    | -3.936  | -0.099 | 0.059   | 0.167   |
|                                           |                                | $\sigma$ | 0.847   | 0.029  | 0.161   | 0.156   |
|                                           |                                |          | —       | —      | (0.119) | (0.178) |
|                                           | <sup>6</sup> H <sub>13/2</sub> | $\mu$    | 100.880 | -3.019 | -3.014  | 0.006   |
|                                           |                                | $\sigma$ | 2.441   | 0.071  | 0.088   | 0.019   |
|                                           |                                |          | —       | —      | —       | (0.016) |

---

Table S3: Lowest energy levels in  $\text{cm}^{-1}$  for  $\text{Eu}^{3+}$  atom, estimated using different approximations to spin-orbit coupling Hamiltonian. Computation at CAHF/CASCI-SO level on ANO-RCC basis set, with the contraction [8s7p5d3f2g1h]. Experimental values from: W.C. Martin, R.Zalubas, and L. Hagan, *Atomic energy levels - the rare-earth elements*, Tech. Rep. (National Bureau of Standards, Gaithersburg, MD, 1978).

|   |                  | $\mathcal{H}_{\text{SO}}^{(1)}$ | $\mathcal{H}_{\text{SO}}^{\text{MF}}$ | $\mathcal{H}_{\text{SO}}^{\text{BP}}$ | EXP. |
|---|------------------|---------------------------------|---------------------------------------|---------------------------------------|------|
| 1 | ${}^7\text{F}_0$ | 0                               | 0                                     | 0                                     | 0    |
| 2 | ${}^7\text{F}_1$ | 1529                            | 382                                   | 369                                   | 370  |
| 3 | ${}^7\text{F}_2$ | 3582                            | 1067                                  | 1028                                  | 1040 |
| 4 | ${}^7\text{F}_3$ | 5765                            | 1967                                  | 1889                                  | 1890 |
| 5 | ${}^7\text{F}_4$ | 7922                            | 3010                                  | 2880                                  | 2860 |
| 6 | ${}^7\text{F}_5$ | 9968                            | 4145                                  | 3949                                  | 3910 |
| 7 | ${}^7\text{F}_6$ | 11813                           | 5334                                  | 5056                                  | 4940 |

Table S4: Lowest energy levels in  $\text{cm}^{-1}$  for  $\text{Pr-acac}_3\text{-(H}_2\text{O)}_2$ , estimated using different approximations to spin-orbit coupling Hamiltonian. Computation at CAHF/CASCI-SO level on ANO-RCC basis set, with the contraction [8s7p5d3f2g1h] for Ln atoms, [4s3p2d1f] for O, [3s2p] for C and N, [2s] for H.

|    |                | $\mathcal{H}_{\text{SO}}^{(1)}$ | $\mathcal{H}_{\text{SO}}^{\text{MF}}$ | $\mathcal{H}_{\text{SO}}^{\text{AMF}}$ | $\mathcal{H}_{\text{SO}}^{\text{ABP}}$ | $\mathcal{H}_{\text{SO}}^{\text{BP}}$ |
|----|----------------|---------------------------------|---------------------------------------|----------------------------------------|----------------------------------------|---------------------------------------|
| 1  | $^3\text{H}_4$ | 0.000                           | 0.000                                 | 0.000                                  | 0.000                                  | 0.000                                 |
| 2  |                | 30.044                          | 35.422                                | 35.337                                 | 35.144                                 | 35.228                                |
| 3  |                | 245.415                         | 257.721                               | 258.120                                | 258.042                                | 257.645                               |
| 4  |                | 323.248                         | 335.834                               | 336.136                                | 335.976                                | 335.677                               |
| 5  |                | 351.058                         | 372.879                               | 373.300                                | 372.979                                | 372.561                               |
| 6  |                | 432.155                         | 454.142                               | 454.707                                | 454.443                                | 453.868                               |
| 7  |                | 463.804                         | 479.552                               | 480.057                                | 479.947                                | 479.445                               |
| 8  |                | 554.146                         | 572.214                               | 573.088                                | 572.854                                | 571.979                               |
| 9  |                | 560.293                         | 578.304                               | 579.185                                | 578.930                                | 578.044                               |
| 10 | $^3\text{H}_5$ | 5100.211                        | 2268.720                              | 2269.091                               | 2261.752                               | 2261.384                              |
| 11 |                | 5101.345                        | 2272.403                              | 2272.775                               | 2265.458                               | 2265.087                              |
| 12 |                | 5313.022                        | 2490.227                              | 2490.486                               | 2483.208                               | 2482.955                              |
| 13 |                | 5342.852                        | 2515.782                              | 2516.078                               | 2508.754                               | 2508.467                              |
| 14 |                | 5404.147                        | 2576.737                              | 2576.882                               | 2569.604                               | 2569.465                              |
| 15 |                | 5447.364                        | 2618.922                              | 2619.038                               | 2611.744                               | 2611.629                              |
| 16 |                | 5477.411                        | 2649.229                              | 2649.455                               | 2642.120                               | 2641.904                              |
| 17 |                | 5529.861                        | 2696.860                              | 2696.933                               | 2689.586                               | 2689.510                              |
| 18 |                | 5536.870                        | 2713.352                              | 2713.432                               | 2706.145                               | 2706.066                              |
| 19 |                | 5631.764                        | 2796.512                              | 2796.416                               | 2789.012                               | 2789.110                              |
| 20 |                | 5639.174                        | 2803.905                              | 2803.813                               | 2796.425                               | 2796.518                              |



Table S5: Lowest energy levels in  $\text{cm}^{-1}$  for  $\text{Nd-acac}_3\text{-(H}_2\text{O)}_2$ , estimated using different approximations to spin-orbit coupling Hamiltonian. Computation at CAHF/CASCI-SO level on ANO-RCC basis set, with the contraction [8s7p5d3f2g1h] for Ln atoms, [4s3p2d1f] for O, [3s2p] for C and N, [2s] for H.

|    |                     | $\mathcal{H}_{\text{SO}}^{(1)}$ | $\mathcal{H}_{\text{SO}}^{\text{MF}}$ | $\mathcal{H}_{\text{SO}}^{\text{AMF}}$ | $\mathcal{H}_{\text{SO}}^{\text{ABP}}$ | $\mathcal{H}_{\text{SO}}^{\text{BP}}$ |
|----|---------------------|---------------------------------|---------------------------------------|----------------------------------------|----------------------------------------|---------------------------------------|
| 1  | $^4\text{I}_{9/2}$  | 0.000                           | 0.000                                 | 0.000                                  | 0.000                                  | 0.000                                 |
| 2  |                     | 119.087                         | 123.800                               | 124.312                                | 124.328                                | 123.791                               |
| 3  |                     | 183.426                         | 199.307                               | 199.927                                | 199.896                                | 199.263                               |
| 4  |                     | 240.237                         | 257.802                               | 258.261                                | 258.306                                | 257.816                               |
| 5  |                     | 293.518                         | 313.924                               | 314.829                                | 314.815                                | 313.880                               |
| 6  | $^4\text{I}_{11/2}$ | 4537.869                        | 1996.989                              | 1997.329                               | 1968.895                               | 1968.565                              |
| 7  |                     | 4618.762                        | 2079.781                              | 2080.100                               | 2051.724                               | 2051.389                              |
| 8  |                     | 4670.952                        | 2131.587                              | 2131.841                               | 2103.463                               | 2103.198                              |
| 9  |                     | 4691.019                        | 2151.582                              | 2151.831                               | 2123.401                               | 2123.149                              |
| 10 |                     | 4710.870                        | 2172.357                              | 2172.616                               | 2144.278                               | 2144.002                              |
| 11 |                     | 4770.697                        | 2232.022                              | 2232.165                               | 2203.795                               | 2203.635                              |

Table S6: Lowest energy levels in  $\text{cm}^{-1}$  for  $\text{Sm-acac}_3\text{-(H}_2\text{O)}_2$ , estimated using different approximations to spin-orbit coupling Hamiltonian. Computation at CAHF/CASCI-SO level on ANO-RCC basis set, with the contraction [8s7p5d3f2g1h] for Ln atoms, [4s3p2d1f] for O, [3s2p] for C and N, [2s] for H.

|                        | $\mathcal{H}_{\text{SO}}^{(1)}$ | $\mathcal{H}_{\text{SO}}^{\text{MF}}$ | $\mathcal{H}_{\text{SO}}^{\text{AMF}}$ | $\mathcal{H}_{\text{SO}}^{\text{ABP}}$ | $\mathcal{H}_{\text{SO}}^{\text{BP}}$ |
|------------------------|---------------------------------|---------------------------------------|----------------------------------------|----------------------------------------|---------------------------------------|
| 1 ${}^6\text{H}_{5/2}$ | 0.000                           | 0.000                                 | 0.000                                  | 0.000                                  | 0.000                                 |
| 2                      | 177.622                         | 177.085                               | 176.653                                | 177.167                                | 177.607                               |
| 3                      | 305.772                         | 312.792                               | 312.168                                | 312.320                                | 312.954                               |
| 4 ${}^6\text{H}_{7/2}$ | 2711.292                        | 1089.569                              | 1089.078                               | 1049.252                               | 1049.762                              |
| 5                      | 2851.411                        | 1225.692                              | 1225.172                               | 1185.704                               | 1186.243                              |
| 6                      | 2912.850                        | 1289.108                              | 1288.577                               | 1249.163                               | 1249.715                              |
| 7                      | 2994.362                        | 1368.264                              | 1367.810                               | 1328.289                               | 1328.763                              |

Table S7: Lowest energy levels in  $\text{cm}^{-1}$  for  $\text{Eu-acac}_3\text{-(H}_2\text{O)}_2$ , estimated using different approximations to spin-orbit coupling Hamiltonian. Computation at CAHF/CASCI-SO level on ANO-RCC basis set, with the contraction [8s7p5d3f2g1h] for Ln atoms, [4s3p2d1f] for O, [3s2p] for C and N, [2s] for H.

|    | $\mathcal{H}_{\text{SO}}^{(1)}$ | $\mathcal{H}_{\text{SO}}^{\text{MF}}$ | $\mathcal{H}_{\text{SO}}^{\text{AMF}}$ | $\mathcal{H}_{\text{SO}}^{\text{ABP}}$ | $\mathcal{H}_{\text{SO}}^{\text{BP}}$ |
|----|---------------------------------|---------------------------------------|----------------------------------------|----------------------------------------|---------------------------------------|
| 1  | ${}^7\text{F}_0$                | 0.000                                 | 0.000                                  | 0.000                                  | 0.000                                 |
| 2  | ${}^7\text{F}_1$                | 1373.933                              | 246.339                                | 246.501                                | 234.193                               |
| 3  |                                 | 1518.521                              | 401.216                                | 401.186                                | 388.828                               |
| 4  |                                 | 1625.032                              | 521.864                                | 521.534                                | 509.521                               |
| 5  | ${}^7\text{F}_2$                | 3406.539                              | 961.186                                | 961.265                                | 924.811                               |
| 6  |                                 | 3454.265                              | 983.695                                | 983.817                                | 945.829                               |
| 7  |                                 | 3556.923                              | 1096.882                               | 1096.698                               | 1058.859                              |
| 8  |                                 | 3604.152                              | 1152.722                               | 1152.520                               | 1115.540                              |
| 9  |                                 | 3638.359                              | 1186.961                               | 1186.467                               | 1149.357                              |
| 10 | ${}^7\text{F}_3$                | 5648.331                              | 1924.055                               | 1924.354                               | 1848.650                              |
| 11 |                                 | 5660.111                              | 1936.855                               | 1937.045                               | 1861.213                              |
| 12 |                                 | 5662.126                              | 1938.488                               | 1938.100                               | 1862.530                              |
| 13 |                                 | 5687.503                              | 1971.047                               | 1970.584                               | 1894.931                              |
| 14 |                                 | 5698.096                              | 1989.560                               | 1989.385                               | 1915.053                              |
| 15 |                                 | 5738.170                              | 2022.017                               | 2021.579                               | 1946.689                              |
| 16 |                                 | 5759.521                              | 2038.474                               | 2038.099                               | 1962.630                              |
| 17 | ${}^7\text{F}_4$                | 7698.420                              | 2878.274                               | 2878.084                               | 2751.521                              |
| 18 |                                 | 7753.565                              | 2928.207                               | 2927.975                               | 2800.857                              |
| 19 |                                 | 7773.922                              | 2945.039                               | 2944.588                               | 2817.105                              |
| 20 |                                 | 7796.118                              | 2966.115                               | 2965.796                               | 2837.764                              |
| 21 |                                 | 7821.712                              | 3012.699                               | 3012.270                               | 2886.686                              |
| 22 |                                 | 7859.958                              | 3039.070                               | 3038.822                               | 2912.385                              |
| 23 |                                 | 7884.314                              | 3066.512                               | 3066.143                               | 2939.921                              |
| 24 |                                 | 7936.953                              | 3116.137                               | 3116.228                               | 2989.366                              |
| 25 |                                 | 7951.923                              | 3131.608                               | 3131.621                               | 3004.739                              |
| 26 | ${}^7\text{F}_5$                | 9727.458                              | 3991.868                               | 3990.845                               | 3797.194                              |
| 27 |                                 | 9731.709                              | 3996.273                               | 3995.287                               | 3801.704                              |
| 28 |                                 | 9770.927                              | 4039.874                               | 4039.547                               | 3846.778                              |
| 29 |                                 | 9781.244                              | 4049.099                               | 4048.848                               | 3855.829                              |
| 30 |                                 | 9840.859                              | 4126.938                               | 4126.616                               | 3935.898                              |
| 31 |                                 | 9856.045                              | 4136.070                               | 4135.768                               | 3944.368                              |
| 32 |                                 | 9891.138                              | 4174.527                               | 4174.319                               | 3983.094                              |
| 33 |                                 | 9902.187                              | 4182.124                               | 4182.195                               | 3990.774                              |
| 34 |                                 | 9930.034                              | 4210.433                               | 4210.372                               | 4018.753                              |
| 35 |                                 | 10018.426                             | 4296.588                               | 4296.775                               | 4104.697                              |
| 36 |                                 | 10022.203                             | 4300.427                               | 4300.618                               | 4108.492                              |
| 37 | ${}^7\text{F}_6$                | 11422.275                             | 5034.872                               | 5033.739                               | 4762.134                              |
| 38 |                                 | 11422.362                             | 5034.987                               | 5033.853                               | 4762.257                              |
| 39 |                                 | 11621.991                             | 5250.835                               | 5250.075                               | 4979.670                              |

|    |           |          |          |          |          |
|----|-----------|----------|----------|----------|----------|
| 40 | 11622.858 | 5251.765 | 5251.012 | 4980.614 | 4981.397 |
| 41 | 11704.953 | 5329.951 | 5329.414 | 5057.497 | 5058.056 |
| 42 | 11709.872 | 5336.197 | 5335.765 | 5064.059 | 5064.518 |
| 43 | 11741.869 | 5367.412 | 5367.038 | 5094.764 | 5095.158 |
| 44 | 11767.201 | 5394.999 | 5394.914 | 5122.833 | 5122.960 |
| 45 | 11773.721 | 5401.445 | 5401.334 | 5129.101 | 5129.252 |
| 46 | 11812.475 | 5438.815 | 5438.578 | 5165.739 | 5166.027 |
| 47 | 11812.652 | 5439.041 | 5438.795 | 5165.955 | 5166.253 |
| 48 | 11880.090 | 5506.517 | 5507.583 | 5234.450 | 5233.441 |
| 49 | 11880.162 | 5506.587 | 5507.653 | 5234.517 | 5233.508 |

---

Table S8: Lowest energy levels in  $\text{cm}^{-1}$  for  $\text{Gd-acac}_3\text{-(H}_2\text{O)}_2$ , estimated using different approximations to spin-orbit coupling Hamiltonian. Computation at CAHF/CASCI-SO level on ANO-RCC basis set, with the contraction [8s7p5d3f2g1h] for Ln atoms, [4s3p2d1f] for O, [3s2p] for C and N, [2s] for H.

|                      | $\mathcal{H}_{\text{SO}}^{(1)}$ | $\mathcal{H}_{\text{SO}}^{\text{MF}}$ | $\mathcal{H}_{\text{SO}}^{\text{AMF}}$ | $\mathcal{H}_{\text{SO}}^{\text{ABP}}$ | $\mathcal{H}_{\text{SO}}^{\text{BP}}$ |
|----------------------|---------------------------------|---------------------------------------|----------------------------------------|----------------------------------------|---------------------------------------|
| 1 $^8\text{H}_{7/2}$ | 0.000                           | 0.000                                 | 0.000                                  | 0.000                                  | 0.000                                 |
| 2                    | 1.198                           | 0.256                                 | 0.240                                  | 0.240                                  | 0.256                                 |
| 3                    | 2.329                           | 0.534                                 | 0.466                                  | 0.465                                  | 0.534                                 |
| 4                    | 4.320                           | 0.978                                 | 0.820                                  | 0.820                                  | 0.978                                 |
| 5 $^6\text{P}_{7/2}$ | 35631.422                       | 38754.739                             | 38755.034                              | 38742.438                              | 38742.153                             |
| 6                    | 35687.191                       | 38791.917                             | 38792.152                              | 38779.474                              | 38779.248                             |
| 7                    | 35728.649                       | 38819.803                             | 38819.965                              | 38807.179                              | 38807.027                             |
| 8                    | 35822.180                       | 38862.123                             | 38862.141                              | 38849.166                              | 38849.156                             |

Table S9: Lowest energy levels in  $\text{cm}^{-1}$  for  $\text{Tb-acac}_3\text{-(H}_2\text{O)}_2$ , estimated using different approximations to spin-orbit coupling Hamiltonian. Computation at CAHF/CASCI-SO level on ANO-RCC basis set, with the contraction [8s7p5d3f2g1h] for Ln atoms, [4s3p2d1f] for O, [3s2p] for C and N, [2s] for H.

|    |                  | $\mathcal{H}_{\text{SO}}^{(1)}$ | $\mathcal{H}_{\text{SO}}^{\text{MF}}$ | $\mathcal{H}_{\text{SO}}^{\text{AMF}}$ | $\mathcal{H}_{\text{SO}}^{\text{ABP}}$ | $\mathcal{H}_{\text{SO}}^{\text{BP}}$ |
|----|------------------|---------------------------------|---------------------------------------|----------------------------------------|----------------------------------------|---------------------------------------|
| 1  | ${}^7\text{F}_6$ | 0.000                           | 0.000                                 | 0.000                                  | 0.000                                  | 0.000                                 |
| 2  |                  | 0.086                           | 0.088                                 | 0.088                                  | 0.089                                  | 0.089                                 |
| 3  |                  | 109.166                         | 110.230                               | 110.745                                | 110.994                                | 110.466                               |
| 4  |                  | 109.498                         | 110.721                               | 111.240                                | 111.488                                | 110.955                               |
| 5  |                  | 178.742                         | 175.074                               | 175.694                                | 176.244                                | 175.607                               |
| 6  |                  | 181.252                         | 177.079                               | 177.679                                | 178.232                                | 177.615                               |
| 7  |                  | 251.493                         | 249.227                               | 249.974                                | 250.728                                | 249.955                               |
| 8  |                  | 274.771                         | 270.802                               | 271.533                                | 272.333                                | 271.578                               |
| 9  |                  | 302.233                         | 301.949                               | 302.774                                | 303.449                                | 302.595                               |
| 10 |                  | 382.280                         | 372.479                               | 373.349                                | 374.708                                | 373.811                               |
| 11 |                  | 385.096                         | 376.714                               | 377.600                                | 378.854                                | 377.941                               |
| 12 |                  | 598.843                         | 609.223                               | 610.352                                | 611.159                                | 610.007                               |
| 13 |                  | 598.918                         | 609.364                               | 610.494                                | 611.296                                | 610.143                               |
| 14 | ${}^7\text{F}_5$ | 4578.634                        | 2134.613                              | 2134.871                               | 2221.242                               | 2220.953                              |
| 15 |                  | 4581.181                        | 2137.687                              | 2137.938                               | 2224.307                               | 2224.024                              |
| 16 |                  | 4709.263                        | 2264.358                              | 2264.789                               | 2351.952                               | 2351.479                              |
| 17 |                  | 4729.411                        | 2285.391                              | 2285.791                               | 2372.912                               | 2372.478                              |
| 18 |                  | 4754.032                        | 2306.305                              | 2306.825                               | 2394.257                               | 2393.687                              |
| 19 |                  | 4790.102                        | 2342.268                              | 2342.862                               | 2430.763                               | 2430.125                              |
| 20 |                  | 4800.710                        | 2358.785                              | 2359.322                               | 2446.743                               | 2446.169                              |
| 21 |                  | 4841.647                        | 2413.206                              | 2413.719                               | 2500.278                               | 2499.730                              |
| 22 |                  | 4843.614                        | 2415.628                              | 2416.174                               | 2502.618                               | 2502.035                              |
| 23 |                  | 4936.468                        | 2506.351                              | 2507.343                               | 2593.697                               | 2592.669                              |
| 24 |                  | 4941.254                        | 2511.618                              | 2512.609                               | 2598.894                               | 2597.867                              |

Table S10: Lowest energy levels in  $\text{cm}^{-1}$  for  $\text{Dy-acac}_3\text{-(H}_2\text{O)}_2$ , estimated using different approximations to spin-orbit coupling Hamiltonian. Computation at CAHF/CASCI-SO level on ANO-RCC basis set, with the contraction [8s7p5d3f2g1h] for Ln atoms, [4s3p2d1f] for O, [3s2p] for C and N, [2s] for H.

|                         | $\mathcal{H}_{\text{SO}}^{(1)}$ | $\mathcal{H}_{\text{SO}}^{\text{MF}}$ | $\mathcal{H}_{\text{SO}}^{\text{AMF}}$ | $\mathcal{H}_{\text{SO}}^{\text{ABP}}$ | $\mathcal{H}_{\text{SO}}^{\text{BP}}$ |
|-------------------------|---------------------------------|---------------------------------------|----------------------------------------|----------------------------------------|---------------------------------------|
| 1 ${}^6\text{H}_{15/2}$ | 0.000                           | 0.000                                 | 0.000                                  | 0.000                                  | 0.000                                 |
| 2                       | 150.012                         | 155.631                               | 155.926                                | 156.224                                | 155.919                               |
| 3                       | 227.942                         | 233.726                               | 234.178                                | 234.441                                | 233.973                               |
| 4                       | 279.416                         | 287.084                               | 287.655                                | 287.940                                | 287.350                               |
| 5                       | 308.225                         | 316.519                               | 317.365                                | 317.671                                | 316.802                               |
| 6                       | 392.191                         | 408.291                               | 409.277                                | 409.614                                | 408.606                               |
| 7                       | 441.406                         | 462.929                               | 463.280                                | 463.546                                | 463.192                               |
| 8                       | 504.802                         | 527.901                               | 529.371                                | 529.712                                | 528.218                               |
| 9 ${}^6\text{H}_{13/2}$ | 7590.741                        | 3604.472                              | 3604.306                               | 3720.021                               | 3720.180                              |
| 10                      | 7667.916                        | 3681.367                              | 3681.459                               | 3797.518                               | 3797.394                              |
| 11                      | 7744.439                        | 3760.008                              | 3760.295                               | 3876.349                               | 3876.011                              |
| 12                      | 7789.661                        | 3806.445                              | 3806.795                               | 3922.803                               | 3922.396                              |
| 13                      | 7833.079                        | 3853.451                              | 3853.829                               | 3969.690                               | 3969.251                              |
| 14                      | 7868.779                        | 3891.231                              | 3891.794                               | 4007.600                               | 4006.987                              |
| 15                      | 7927.175                        | 3949.623                              | 3950.773                               | 4066.627                               | 4065.433                              |

Table S11: Lowest energy levels in  $\text{cm}^{-1}$  for Dy-acac<sub>3</sub>-dppz, estimated using different approximations to spin-orbit coupling Hamiltonian. Computation at CAHF/CASCI-SO level on ANO-RCC basis set, with the contraction [8s7p5d3f2g1h] for Ln atoms, [4s3p2d1f] for O, [3s2p] for C and N, [2s] for H.

|                         | $\mathcal{H}_{\text{SO}}^{(1)}$ | $\mathcal{H}_{\text{SO}}^{\text{MF}}$ | $\mathcal{H}_{\text{SO}}^{\text{AMF}}$ | $\mathcal{H}_{\text{SO}}^{\text{ABP}}$ | $\mathcal{H}_{\text{SO}}^{\text{BP}}$ |
|-------------------------|---------------------------------|---------------------------------------|----------------------------------------|----------------------------------------|---------------------------------------|
| 1 ${}^6\text{H}_{15/2}$ | 0.000                           | 0.000                                 | 0.000                                  | 0.000                                  | 0.000                                 |
| 2                       | 140.260                         | 146.058                               | 146.238                                | 146.525                                | 146.334                               |
| 3                       | 216.017                         | 220.812                               | 221.069                                | 221.339                                | 221.062                               |
| 4                       | 252.616                         | 258.739                               | 258.929                                | 259.182                                | 258.961                               |
| 5                       | 284.484                         | 294.399                               | 294.613                                | 294.884                                | 294.643                               |
| 6                       | 331.070                         | 347.807                               | 347.545                                | 347.798                                | 348.046                               |
| 7                       | 389.570                         | 407.767                               | 408.196                                | 408.522                                | 408.059                               |
| 8                       | 482.724                         | 507.087                               | 507.844                                | 508.170                                | 507.399                               |
| 9 ${}^6\text{H}_{13/2}$ | 7578.824                        | 3593.847                              | 3593.496                               | 3709.120                               | 3709.457                              |
| 10                      | 7662.257                        | 3676.720                              | 3676.694                               | 3792.632                               | 3792.626                              |
| 11                      | 7735.159                        | 3752.413                              | 3752.448                               | 3868.375                               | 3868.289                              |
| 12                      | 7763.013                        | 3782.877                              | 3782.624                               | 3898.441                               | 3898.637                              |
| 13                      | 7799.203                        | 3817.762                              | 3817.716                               | 3933.601                               | 3933.597                              |
| 14                      | 7820.567                        | 3842.565                              | 3842.681                               | 3958.441                               | 3958.256                              |
| 15                      | 7864.291                        | 3889.519                              | 3889.862                               | 4005.493                               | 4005.088                              |



Table S12: Lowest energy levels in  $\text{cm}^{-1}$  for Dy-acac<sub>3</sub>-dpq, estimated using different approximations to spin-orbit coupling Hamiltonian. Computation at CAHF/CASCI-SO level on ANO-RCC basis set, with the contraction [8s7p5d3f2g1h] for Ln atoms, [4s3p2d1f] for O, [3s2p] for C and N, [2s] for H.

|                         | $\mathcal{H}_{\text{SO}}^{(1)}$ | $\mathcal{H}_{\text{SO}}^{\text{MF}}$ | $\mathcal{H}_{\text{SO}}^{\text{AMF}}$ | $\mathcal{H}_{\text{SO}}^{\text{ABP}}$ | $\mathcal{H}_{\text{SO}}^{\text{BP}}$ |
|-------------------------|---------------------------------|---------------------------------------|----------------------------------------|----------------------------------------|---------------------------------------|
| 1 ${}^6\text{H}_{15/2}$ | 0.000                           | 0.000                                 | 0.000                                  | 0.000                                  | 0.000                                 |
| 2                       | 115.823                         | 121.063                               | 121.091                                | 121.300                                | 121.265                               |
| 3                       | 183.165                         | 188.351                               | 188.291                                | 188.503                                | 188.549                               |
| 4                       | 219.752                         | 225.325                               | 225.250                                | 225.483                                | 225.539                               |
| 5                       | 259.673                         | 267.290                               | 267.295                                | 267.586                                | 267.560                               |
| 6                       | 279.837                         | 291.320                               | 291.175                                | 291.433                                | 291.563                               |
| 7                       | 385.096                         | 404.242                               | 404.679                                | 404.986                                | 404.516                               |
| 8                       | 515.146                         | 540.573                               | 540.678                                | 540.984                                | 540.875                               |
| 9 ${}^6\text{H}_{13/2}$ | 7561.693                        | 3574.656                              | 3574.412                               | 3690.108                               | 3690.334                              |
| 10                      | 7647.109                        | 3660.830                              | 3660.653                               | 3776.558                               | 3776.709                              |
| 11                      | 7698.455                        | 3714.005                              | 3713.662                               | 3829.550                               | 3829.849                              |
| 12                      | 7725.342                        | 3742.333                              | 3741.930                               | 3857.782                               | 3858.137                              |
| 13                      | 7771.694                        | 3788.416                              | 3788.278                               | 3904.199                               | 3904.284                              |
| 14                      | 7812.332                        | 3833.729                              | 3833.726                               | 3949.506                               | 3949.458                              |
| 15                      | 7893.439                        | 3919.229                              | 3919.106                               | 4034.756                               | 4034.821                              |

Table S13: Lowest energy levels in  $\text{cm}^{-1}$  for Dy-acac<sub>3</sub>-phen, estimated using different approximations to spin-orbit coupling Hamiltonian. Computation at CAHF/CASCI-SO level on ANO-RCC basis set, with the contraction [8s7p5d3f2g1h] for Ln atoms, [4s3p2d1f] for O, [3s2p] for C and N, [2s] for H.

|                         | $\mathcal{H}_{\text{SO}}^{(1)}$ | $\mathcal{H}_{\text{SO}}^{\text{MF}}$ | $\mathcal{H}_{\text{SO}}^{\text{AMF}}$ | $\mathcal{H}_{\text{SO}}^{\text{ABP}}$ | $\mathcal{H}_{\text{SO}}^{\text{BP}}$ |
|-------------------------|---------------------------------|---------------------------------------|----------------------------------------|----------------------------------------|---------------------------------------|
| 1 ${}^6\text{H}_{15/2}$ | 0.000                           | 0.000                                 | 0.000                                  | 0.000                                  | 0.000                                 |
| 2                       | 123.698                         | 129.729                               | 129.951                                | 130.197                                | 129.963                               |
| 3                       | 193.171                         | 198.917                               | 199.001                                | 199.249                                | 199.149                               |
| 4                       | 244.202                         | 250.050                               | 250.095                                | 250.340                                | 250.270                               |
| 5                       | 284.896                         | 292.441                               | 292.697                                | 292.986                                | 292.695                               |
| 6                       | 320.482                         | 337.056                               | 336.694                                | 336.955                                | 337.298                               |
| 7                       | 405.817                         | 425.197                               | 425.920                                | 426.274                                | 425.509                               |
| 8                       | 493.610                         | 517.999                               | 519.016                                | 519.358                                | 518.314                               |
| 9 ${}^6\text{H}_{13/2}$ | 7567.171                        | 3581.339                              | 3580.932                               | 3696.600                               | 3696.986                              |
| 10                      | 7650.893                        | 3664.519                              | 3664.507                               | 3780.435                               | 3780.414                              |
| 11                      | 7718.129                        | 3734.289                              | 3734.242                               | 3850.170                               | 3850.170                              |
| 12                      | 7755.668                        | 3774.985                              | 3774.499                               | 3890.331                               | 3890.759                              |
| 13                      | 7792.445                        | 3811.010                              | 3811.021                               | 3926.910                               | 3926.838                              |
| 14                      | 7830.099                        | 3852.449                              | 3852.806                               | 3968.569                               | 3968.141                              |
| 15                      | 7888.933                        | 3912.703                              | 3913.335                               | 4029.106                               | 4028.407                              |

Table S14: Lowest energy levels in  $\text{cm}^{-1}$  for Dy-hfac<sub>3</sub>-glyme, estimated using different approximations to spin-orbit coupling Hamiltonian. Computation at CAHF/CASCI-SO level on ANO-RCC basis set, with the contraction [8s7p5d3f2g1h] for Ln atoms, [4s3p2d1f] for O, [3s2p] for C and N, [2s] for H.

|                         | $\mathcal{H}_{\text{SO}}^{(1)}$ | $\mathcal{H}_{\text{SO}}^{\text{MF}}$ | $\mathcal{H}_{\text{SO}}^{\text{AMF}}$ | $\mathcal{H}_{\text{SO}}^{\text{ABP}}$ | $\mathcal{H}_{\text{SO}}^{\text{BP}}$ |
|-------------------------|---------------------------------|---------------------------------------|----------------------------------------|----------------------------------------|---------------------------------------|
| 1 ${}^6\text{H}_{15/2}$ | 0.000                           | 0.000                                 | 0.000                                  | 0.000                                  | 0.000                                 |
| 2                       | 105.036                         | 108.469                               | 108.605                                | 108.768                                | 108.627                               |
| 3                       | 156.141                         | 157.833                               | 158.129                                | 158.300                                | 157.993                               |
| 4                       | 182.523                         | 186.353                               | 186.838                                | 187.023                                | 186.523                               |
| 5                       | 210.550                         | 218.292                               | 218.160                                | 218.300                                | 218.428                               |
| 6                       | 239.918                         | 249.820                               | 250.098                                | 250.292                                | 250.000                               |
| 7                       | 300.513                         | 313.612                               | 314.499                                | 314.743                                | 313.831                               |
| 8                       | 428.731                         | 450.082                               | 451.792                                | 452.086                                | 450.360                               |
| 9 ${}^6\text{H}_{13/2}$ | 7547.744                        | 3558.825                              | 3558.305                               | 3673.997                               | 3674.502                              |
| 10                      | 7628.518                        | 3639.850                              | 3639.693                               | 3755.570                               | 3755.696                              |
| 11                      | 7670.593                        | 3684.425                              | 3684.138                               | 3799.947                               | 3800.201                              |
| 12                      | 7692.455                        | 3705.553                              | 3705.504                               | 3821.370                               | 3821.375                              |
| 13                      | 7729.002                        | 3742.389                              | 3742.794                               | 3858.691                               | 3858.238                              |
| 14                      | 7753.931                        | 3769.822                              | 3770.476                               | 3886.304                               | 3885.593                              |
| 15                      | 7807.296                        | 3827.080                              | 3828.392                               | 3944.047                               | 3942.673                              |

Table S15: Lowest energy levels in  $\text{cm}^{-1}$  for Dy-trensals, estimated using different approximations to spin-orbit coupling Hamiltonian. Computation at CAHF/CASCI-SO level on ANO-RCC basis set, with the contraction [8s7p5d3f2g1h] for Ln atoms, [4s3p2d1f] for O and N, [3s2p] for C, [2s] for H.

|                         | $\mathcal{H}_{\text{SO}}^{(1)}$ | $\mathcal{H}_{\text{SO}}^{\text{MF}}$ | $\mathcal{H}_{\text{SO}}^{\text{AMF}}$ | $\mathcal{H}_{\text{SO}}^{\text{ABP}}$ | $\mathcal{H}_{\text{SO}}^{\text{BP}}$ |
|-------------------------|---------------------------------|---------------------------------------|----------------------------------------|----------------------------------------|---------------------------------------|
| 1 ${}^6\text{H}_{15/2}$ | 0.000                           | 0.000                                 | 0.000                                  | 0.000                                  | 0.000                                 |
| 2                       | 30.532                          | 28.562                                | 28.583                                 | 28.657                                 | 28.635                                |
| 3                       | 77.086                          | 69.843                                | 69.927                                 | 69.998                                 | 69.906                                |
| 4                       | 153.117                         | 145.131                               | 145.382                                | 145.604                                | 145.331                               |
| 5                       | 306.436                         | 313.409                               | 313.666                                | 313.918                                | 313.653                               |
| 6                       | 405.853                         | 416.679                               | 416.949                                | 417.287                                | 417.013                               |
| 7                       | 467.548                         | 479.501                               | 479.873                                | 480.526                                | 480.142                               |
| 8                       | 632.417                         | 664.100                               | 664.873                                | 665.695                                | 664.883                               |
| 9 ${}^6\text{H}_{13/2}$ | 7576.211                        | 3589.180                              | 3588.990                               | 3704.767                               | 3704.955                              |
| 10                      | 7602.143                        | 3614.904                              | 3614.734                               | 3730.460                               | 3730.619                              |
| 11                      | 7615.016                        | 3632.699                              | 3632.623                               | 3748.059                               | 3748.119                              |
| 12                      | 7741.450                        | 3766.543                              | 3766.358                               | 3881.795                               | 3881.926                              |
| 13                      | 7793.046                        | 3824.058                              | 3824.101                               | 3939.366                               | 3939.271                              |
| 14                      | 7894.758                        | 3914.115                              | 3914.361                               | 4030.384                               | 4030.077                              |
| 15                      | 7935.145                        | 3963.457                              | 3963.967                               | 4079.887                               | 4079.295                              |

Table S16: Lowest energy levels in  $\text{cm}^{-1}$  for  $\text{Dy-paah}_2\text{-(NO}_3)_2$ , estimated using different approximations to spin-orbit coupling Hamiltonian. Computation at CAHF/CASCI-SO level on ANO-RCC basis set, with the contraction [8s7p5d3f2g1h] for Ln atoms, [4s3p2d1f] for O, [3s2p] for C and N, [2s] for H.

|                         | $\mathcal{H}_{\text{SO}}^{(1)}$ | $\mathcal{H}_{\text{SO}}^{\text{MF}}$ | $\mathcal{H}_{\text{SO}}^{\text{AMF}}$ | $\mathcal{H}_{\text{SO}}^{\text{ABP}}$ | $\mathcal{H}_{\text{SO}}^{\text{BP}}$ |
|-------------------------|---------------------------------|---------------------------------------|----------------------------------------|----------------------------------------|---------------------------------------|
| 1 ${}^6\text{H}_{15/2}$ | 0.000                           | 0.000                                 | 0.000                                  | 0.000                                  | 0.000                                 |
| 2                       | 109.198                         | 110.283                               | 110.416                                | 110.556                                | 110.409                               |
| 3                       | 192.180                         | 193.223                               | 193.518                                | 193.749                                | 193.424                               |
| 4                       | 247.590                         | 251.089                               | 251.523                                | 251.809                                | 251.334                               |
| 5                       | 297.334                         | 311.742                               | 312.689                                | 312.944                                | 311.951                               |
| 6                       | 325.382                         | 340.487                               | 341.296                                | 341.611                                | 340.762                               |
| 7                       | 373.400                         | 390.952                               | 391.449                                | 391.786                                | 391.250                               |
| 8                       | 409.699                         | 433.665                               | 434.412                                | 434.799                                | 434.005                               |
| 9 ${}^6\text{H}_{13/2}$ | 7545.738                        | 3557.050                              | 3556.885                               | 3672.583                               | 3672.721                              |
| 10                      | 7650.197                        | 3663.305                              | 3663.254                               | 3779.144                               | 3779.144                              |
| 11                      | 7714.155                        | 3728.925                              | 3728.985                               | 3844.923                               | 3844.795                              |
| 12                      | 7753.580                        | 3770.906                              | 3771.287                               | 3887.163                               | 3886.710                              |
| 13                      | 7794.618                        | 3811.331                              | 3811.634                               | 3927.572                               | 3927.200                              |
| 14                      | 7824.415                        | 3843.471                              | 3843.933                               | 3959.780                               | 3959.238                              |
| 15                      | 7846.033                        | 3864.461                              | 3865.070                               | 3980.904                               | 3980.228                              |

Table S17: Lowest energy levels in  $\text{cm}^{-1}$  for Dy-tta<sub>3</sub>-phen, estimated using different approximations to spin-orbit coupling Hamiltonian. Computation at CAHF/CASCI-SO level on ANO-RCC basis set, with the contraction [8s7p5d3f2g1h] for Ln atoms, [4s3p2d1f] for N and O, [3s2p] for C, F, and S, [2s] for H.

|                         | $\mathcal{H}_{\text{SO}}^{(1)}$ | $\mathcal{H}_{\text{SO}}^{\text{MF}}$ | $\mathcal{H}_{\text{SO}}^{\text{AMF}}$ | $\mathcal{H}_{\text{SO}}^{\text{ABP}}$ | $\mathcal{H}_{\text{SO}}^{\text{BP}}$ |
|-------------------------|---------------------------------|---------------------------------------|----------------------------------------|----------------------------------------|---------------------------------------|
| 1 ${}^6\text{H}_{15/2}$ | 0.000                           | 0.000                                 | 0.000                                  | 0.000                                  | 0.000                                 |
| 2                       | 117.665                         | 122.997                               | 123.231                                | 123.458                                | 123.210                               |
| 3                       | 166.787                         | 169.195                               | 169.554                                | 169.741                                | 169.357                               |
| 4                       | 203.114                         | 206.342                               | 206.939                                | 207.192                                | 206.561                               |
| 5                       | 227.402                         | 234.548                               | 234.952                                | 235.179                                | 234.746                               |
| 6                       | 265.610                         | 275.016                               | 275.521                                | 275.786                                | 275.248                               |
| 7                       | 361.611                         | 377.794                               | 378.772                                | 379.123                                | 378.100                               |
| 8                       | 487.695                         | 511.291                               | 512.400                                | 512.745                                | 511.614                               |
| 9 ${}^6\text{H}_{13/2}$ | 7553.139                        | 3565.672                              | 3565.383                               | 3681.050                               | 3681.312                              |
| 10                      | 7634.731                        | 3646.460                              | 3646.441                               | 3762.354                               | 3762.334                              |
| 11                      | 7689.971                        | 3704.977                              | 3704.988                               | 3820.811                               | 3820.746                              |
| 12                      | 7715.653                        | 3730.283                              | 3730.524                               | 3846.432                               | 3846.140                              |
| 13                      | 7760.726                        | 3775.687                              | 3776.148                               | 3892.111                               | 3891.592                              |
| 14                      | 7788.348                        | 3807.378                              | 3808.035                               | 3923.867                               | 3923.136                              |
| 15                      | 7856.250                        | 3879.738                              | 3880.589                               | 3996.229                               | 3995.301                              |

Table S18: Lowest energy levels in  $\text{cm}^{-1}$  for Dy-tta<sub>3</sub>-bipy, estimated using different approximations to spin-orbit coupling Hamiltonian. Computation at CAHF/CASCI-SO level on ANO-RCC basis set, with the contraction [8s7p5d3f2g1h] for Ln atoms, [4s3p2d1f] for N and O, [3s2p] for C, F, and S, [2s] for H.

|                         | $\mathcal{H}_{\text{SO}}^{(1)}$ | $\mathcal{H}_{\text{SO}}^{\text{MF}}$ | $\mathcal{H}_{\text{SO}}^{\text{AMF}}$ | $\mathcal{H}_{\text{SO}}^{\text{ABP}}$ | $\mathcal{H}_{\text{SO}}^{\text{BP}}$ |
|-------------------------|---------------------------------|---------------------------------------|----------------------------------------|----------------------------------------|---------------------------------------|
| 1 ${}^6\text{H}_{15/2}$ | 0.000                           | 0.000                                 | 0.000                                  | 0.000                                  | 0.000                                 |
| 2                       | 130.105                         | 135.951                               | 136.005                                | 136.165                                | 136.096                               |
| 3                       | 147.499                         | 152.480                               | 152.834                                | 153.091                                | 152.724                               |
| 4                       | 187.634                         | 192.431                               | 192.603                                | 192.815                                | 192.626                               |
| 5                       | 218.189                         | 225.365                               | 225.264                                | 225.471                                | 225.559                               |
| 6                       | 268.511                         | 280.652                               | 281.054                                | 281.322                                | 280.893                               |
| 7                       | 360.112                         | 376.932                               | 377.729                                | 378.070                                | 377.237                               |
| 8                       | 429.879                         | 451.812                               | 453.789                                | 454.149                                | 452.146                               |
| 9 ${}^6\text{H}_{13/2}$ | 7559.534                        | 3574.052                              | 3573.339                               | 3688.962                               | 3689.655                              |
| 10                      | 7635.883                        | 3649.515                              | 3649.194                               | 3765.036                               | 3765.323                              |
| 11                      | 7672.084                        | 3688.366                              | 3688.082                               | 3803.845                               | 3804.093                              |
| 12                      | 7717.070                        | 3732.728                              | 3732.840                               | 3848.717                               | 3848.560                              |
| 13                      | 7743.719                        | 3759.812                              | 3760.521                               | 3876.502                               | 3875.744                              |
| 14                      | 7783.997                        | 3804.852                              | 3805.502                               | 3921.229                               | 3920.504                              |
| 15                      | 7809.158                        | 3829.661                              | 3830.967                               | 3946.705                               | 3945.324                              |

Table S19: Lowest energy levels in  $\text{cm}^{-1}$  for  $\text{Ho-acac}_3\text{-(H}_2\text{O)}_2$ , estimated using different approximations to spin-orbit coupling Hamiltonian. Computation at CAHF/CASCI-SO level on ANO-RCC basis set, with the contraction [8s7p5d3f2g1h] for Ln atoms, [4s3p2d1f] for O, [3s2p] for C and N, [2s] for H.

|    |                | $\mathcal{H}_{\text{SO}}^{(1)}$ | $\mathcal{H}_{\text{SO}}^{\text{MF}}$ | $\mathcal{H}_{\text{SO}}^{\text{AMF}}$ | $\mathcal{H}_{\text{SO}}^{\text{ABP}}$ | $\mathcal{H}_{\text{SO}}^{\text{BP}}$ |
|----|----------------|---------------------------------|---------------------------------------|----------------------------------------|----------------------------------------|---------------------------------------|
| 1  | $^5\text{I}_8$ | 0.000                           | 0.000                                 | 0.000                                  | 0.000                                  | 0.000                                 |
| 2  |                | 1.919                           | 2.182                                 | 2.140                                  | 2.147                                  | 2.190                                 |
| 3  |                | 46.129                          | 50.707                                | 51.257                                 | 51.368                                 | 50.787                                |
| 4  |                | 52.377                          | 58.020                                | 58.590                                 | 58.714                                 | 58.117                                |
| 5  |                | 84.145                          | 93.831                                | 94.794                                 | 95.001                                 | 94.013                                |
| 6  |                | 108.648                         | 122.029                               | 123.069                                | 123.319                                | 122.255                               |
| 7  |                | 129.353                         | 144.360                               | 145.815                                | 146.136                                | 144.645                               |
| 8  |                | 142.483                         | 159.688                               | 160.937                                | 161.270                                | 159.981                               |
| 9  |                | 149.947                         | 167.620                               | 168.593                                | 168.957                                | 167.933                               |
| 10 |                | 165.937                         | 185.877                               | 186.440                                | 186.840                                | 186.228                               |
| 11 |                | 182.349                         | 204.311                               | 205.442                                | 205.871                                | 204.680                               |
| 12 |                | 190.878                         | 212.945                               | 214.624                                | 215.061                                | 213.305                               |
| 13 |                | 197.172                         | 219.965                               | 221.302                                | 221.774                                | 220.362                               |
| 14 |                | 206.744                         | 231.834                               | 232.292                                | 232.771                                | 232.246                               |
| 15 |                | 220.600                         | 247.650                               | 248.364                                | 248.888                                | 248.109                               |
| 16 |                | 251.539                         | 282.228                               | 284.298                                | 284.909                                | 282.779                               |
| 17 |                | 252.224                         | 283.145                               | 285.208                                | 285.821                                | 283.699                               |
| 18 | $^5\text{I}_7$ | 10504.775                       | 5158.213                              | 5158.016                               | 5276.684                               | 5276.792                              |
| 19 |                | 10504.879                       | 5158.382                              | 5158.183                               | 5276.851                               | 5276.962                              |
| 20 |                | 10552.648                       | 5208.799                              | 5209.058                               | 5327.730                               | 5327.393                              |
| 21 |                | 10553.927                       | 5210.656                              | 5210.902                               | 5329.574                               | 5329.249                              |
| 22 |                | 10586.377                       | 5244.056                              | 5244.654                               | 5363.403                               | 5362.728                              |
| 23 |                | 10593.621                       | 5252.806                              | 5253.363                               | 5372.110                               | 5371.482                              |
| 24 |                | 10599.377                       | 5258.857                              | 5259.545                               | 5378.293                               | 5377.520                              |
| 25 |                | 10607.311                       | 5267.616                              | 5268.188                               | 5386.907                               | 5386.256                              |
| 26 |                | 10614.533                       | 5275.319                              | 5276.007                               | 5394.734                               | 5393.974                              |
| 27 |                | 10618.157                       | 5279.770                              | 5279.788                               | 5398.482                               | 5398.405                              |
| 28 |                | 10621.291                       | 5283.129                              | 5283.250                               | 5401.952                               | 5401.773                              |
| 29 |                | 10628.557                       | 5289.912                              | 5291.177                               | 5409.923                               | 5408.578                              |
| 30 |                | 10629.669                       | 5291.149                              | 5292.406                               | 5411.152                               | 5409.817                              |
| 31 |                | 10678.232                       | 5342.224                              | 5344.069                               | 5462.801                               | 5460.893                              |
| 32 |                | 10678.298                       | 5342.304                              | 5344.149                               | 5462.881                               | 5460.973                              |



Table S20: Lowest energy levels in  $\text{cm}^{-1}$  for  $\text{Er-acac}_3\text{-(H}_2\text{O)}_2$ , estimated using different approximations to spin-orbit coupling Hamiltonian. Computation at CAHF/CASCI-SO level on ANO-RCC basis set, with the contraction [8s7p5d3f2g1h] for Ln atoms, [4s3p2d1f] for O, [3s2p] for C and N, [2s] for H.

|    |                       | $\mathcal{H}_{\text{SO}}^{(1)}$ | $\mathcal{H}_{\text{SO}}^{\text{MF}}$ | $\mathcal{H}_{\text{SO}}^{\text{AMF}}$ | $\mathcal{H}_{\text{SO}}^{\text{ABP}}$ | $\mathcal{H}_{\text{SO}}^{\text{BP}}$ |
|----|-----------------------|---------------------------------|---------------------------------------|----------------------------------------|----------------------------------------|---------------------------------------|
| 1  | ${}^4\text{I}_{15/2}$ | 0.000                           | 0.000                                 | 0.000                                  | 0.000                                  | 0.000                                 |
| 2  |                       | 36.831                          | 37.218                                | 36.034                                 | 36.052                                 | 37.255                                |
| 3  |                       | 74.791                          | 73.151                                | 72.775                                 | 72.820                                 | 73.200                                |
| 4  |                       | 100.935                         | 97.498                                | 96.568                                 | 96.576                                 | 97.505                                |
| 5  |                       | 136.949                         | 137.747                               | 137.332                                | 137.469                                | 137.864                               |
| 6  |                       | 184.714                         | 183.265                               | 182.466                                | 182.581                                | 183.347                               |
| 7  |                       | 266.129                         | 262.179                               | 260.916                                | 261.015                                | 262.248                               |
| 8  |                       | 323.567                         | 316.769                               | 314.869                                | 314.921                                | 316.775                               |
| 9  | ${}^4\text{I}_{13/2}$ | 12759.303                       | 6612.572                              | 6612.129                               | 6693.212                               | 6693.604                              |
| 10 |                       | 12789.242                       | 6642.180                              | 6640.532                               | 6721.613                               | 6723.204                              |
| 11 |                       | 12819.419                       | 6671.957                              | 6671.104                               | 6752.167                               | 6752.985                              |
| 12 |                       | 12836.205                       | 6688.354                              | 6687.029                               | 6768.101                               | 6769.386                              |
| 13 |                       | 12868.241                       | 6720.243                              | 6718.951                               | 6799.999                               | 6801.262                              |
| 14 |                       | 12924.615                       | 6775.984                              | 6774.444                               | 6855.483                               | 6856.993                              |
| 15 |                       | 12984.987                       | 6834.685                              | 6832.727                               | 6913.722                               | 6915.667                              |

Table S21: Lowest energy levels in  $\text{cm}^{-1}$  for  $\text{Tm-acac}_3\text{-(H}_2\text{O)}_2$ , estimated using different approximations to spin-orbit coupling Hamiltonian. Computation at CAHF/CASCI-SO level on ANO-RCC basis set, with the contraction [8s7p5d3f2g1h] for Ln atoms, [4s3p2d1f] for O, [3s2p] for C and N, [2s] for H.

|    | $\mathcal{H}_{\text{SO}}^{(1)}$ | $\mathcal{H}_{\text{SO}}^{\text{MF}}$ | $\mathcal{H}_{\text{SO}}^{\text{AMF}}$ | $\mathcal{H}_{\text{SO}}^{\text{ABP}}$ | $\mathcal{H}_{\text{SO}}^{\text{BP}}$ |
|----|---------------------------------|---------------------------------------|----------------------------------------|----------------------------------------|---------------------------------------|
| 1  | ${}^3\text{H}_6$                | 0.000                                 | 0.000                                  | 0.000                                  | 0.000                                 |
| 2  |                                 | 0.710                                 | 0.713                                  | 0.721                                  | 0.713                                 |
| 3  |                                 | 137.511                               | 139.317                                | 138.485                                | 139.389                               |
| 4  |                                 | 141.074                               | 142.578                                | 141.713                                | 142.644                               |
| 5  |                                 | 188.034                               | 188.855                                | 187.311                                | 188.912                               |
| 6  |                                 | 202.109                               | 202.194                                | 200.521                                | 202.236                               |
| 7  |                                 | 253.536                               | 253.171                                | 251.595                                | 253.222                               |
| 8  |                                 | 305.557                               | 304.046                                | 302.132                                | 304.083                               |
| 9  |                                 | 321.478                               | 320.195                                | 318.348                                | 320.231                               |
| 10 |                                 | 427.783                               | 424.983                                | 422.620                                | 425.008                               |
| 11 |                                 | 428.420                               | 425.746                                | 423.402                                | 425.771                               |
| 12 |                                 | 634.833                               | 632.315                                | 629.472                                | 632.376                               |
| 13 |                                 | 634.905                               | 632.398                                | 629.553                                | 632.459                               |
| 14 | ${}^3\text{H}_5$                | 6457.523                              | 6900.916                               | 6899.561                               | 6958.324                              |
| 15 |                                 | 6498.903                              | 6944.529                               | 6943.114                               | 7000.986                              |
| 16 |                                 | 6538.608                              | 6976.716                               | 6974.969                               | 7034.027                              |
| 17 |                                 | 6544.062                              | 6991.190                               | 6989.564                               | 7047.778                              |
| 18 |                                 | 6592.535                              | 7032.458                               | 7030.819                               | 7089.153                              |
| 19 |                                 | 6641.845                              | 7100.982                               | 7099.326                               | 7156.263                              |
| 20 |                                 | 6660.412                              | 7121.374                               | 7119.760                               | 7175.855                              |
| 21 |                                 | 6711.782                              | 7149.517                               | 7147.674                               | 7205.678                              |
| 22 |                                 | 6725.750                              | 7173.261                               | 7171.467                               | 7228.504                              |
| 23 |                                 | 15519.004                             | 8360.321                               | 8358.678                               | 8390.166                              |
| 24 |                                 | 15519.434                             | 8361.362                               | 8359.721                               | 8391.226                              |

Table S22: Lowest energy levels in  $\text{cm}^{-1}$  for  $\text{Yb-acac}_3\text{-(H}_2\text{O)}_2$ , estimated using different approximations to spin-orbit coupling Hamiltonian. Computation at CAHF/CASCI-SO level on ANO-RCC basis set, with the contraction [8s7p5d3f2g1h] for Ln atoms, [4s3p2d1f] for O, [3s2p] for C and N, [2s] for H.

|                      | $\mathcal{H}_{\text{SO}}^{(1)}$ | $\mathcal{H}_{\text{SO}}^{\text{MF}}$ | $\mathcal{H}_{\text{SO}}^{\text{AMF}}$ | $\mathcal{H}_{\text{SO}}^{\text{ABP}}$ | $\mathcal{H}_{\text{SO}}^{\text{BP}}$ |
|----------------------|---------------------------------|---------------------------------------|----------------------------------------|----------------------------------------|---------------------------------------|
| 1 $^2\text{F}_{7/2}$ | 0.000                           | 0.000                                 | 0.000                                  | 0.000                                  | 0.000                                 |
| 2                    | 210.998                         | 208.998                               | 208.662                                | 208.661                                | 208.988                               |
| 3                    | 253.015                         | 251.256                               | 250.563                                | 250.563                                | 251.250                               |
| 4                    | 360.947                         | 359.358                               | 358.009                                | 358.010                                | 359.345                               |
| 5 $^2\text{F}_{5/2}$ | 19085.144                       | 10611.114                             | 10609.584                              | 10581.883                              | 10583.408                             |
| 6                    | 19259.737                       | 10787.325                             | 10786.045                              | 10758.341                              | 10759.617                             |
| 7                    | 19372.892                       | 10900.917                             | 10900.108                              | 10872.402                              | 10873.215                             |
